# Supplementary material for: Facile synthesis of selenium/potassium tartrate derived porous carbon composite as an advanced Li–Se battery cathode
Source: Royal Society of Chemistry journal article supplement (doi:10.1039/c6ra07837k), 2016-01-01
Supplement: c6ra07837k1.pdf [file c6ra07837k1.pdf]

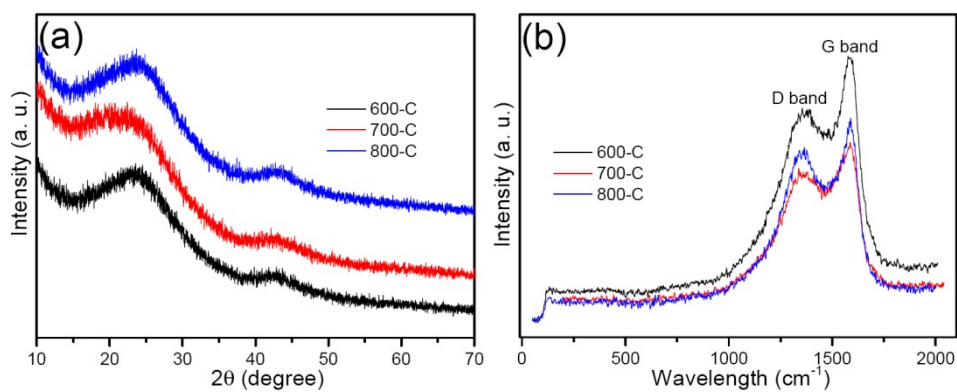

**Fig. S1** (a) XRD patterns and (b) Raman spectrums of potassium tartrate derived carbon obtained from different carbonization temperatures.

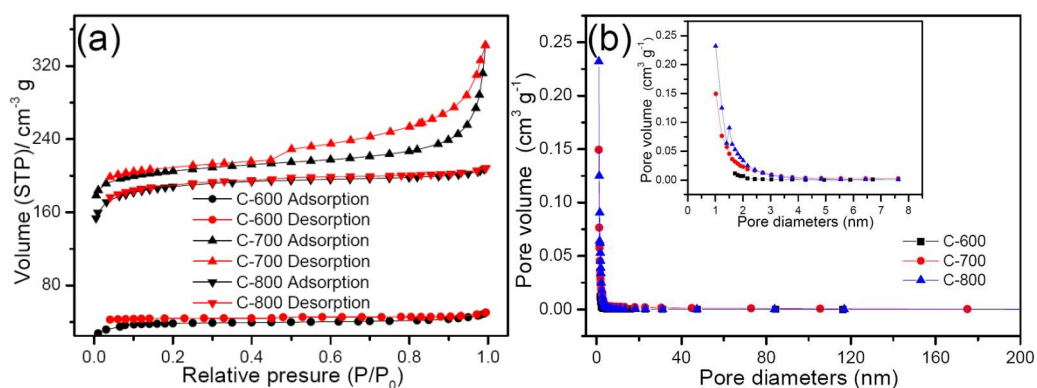

**Fig. S2.** (a) N<sub>2</sub> adsorption-desorption isotherms and (b) pore size distribution of different carbon, the insert is the pore size distribution of 0-8 nm.

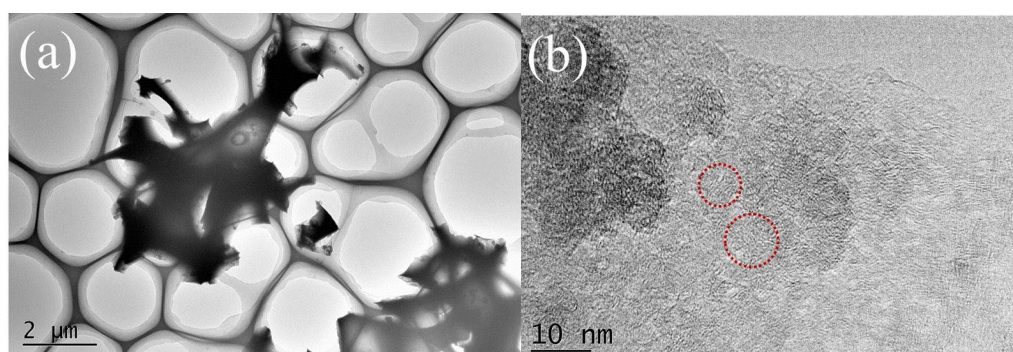

**Fig. S3.** (a) TEM and (b) HR-TEM image of as-prepared Se/C composite.

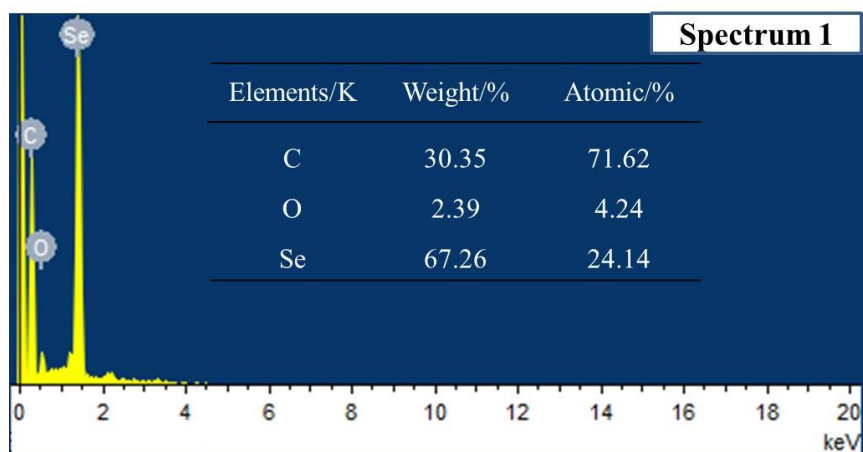

Fig. S4. EDS element analysis of Se/C-700 composite.

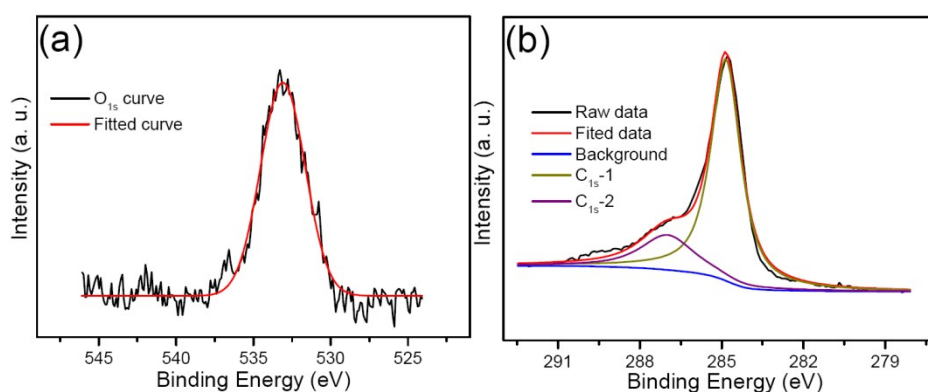

Fig. S5. XPS spectra of  $O_{1s}$  and  $C_{1s}$  for potassium tartrate derived carbon.

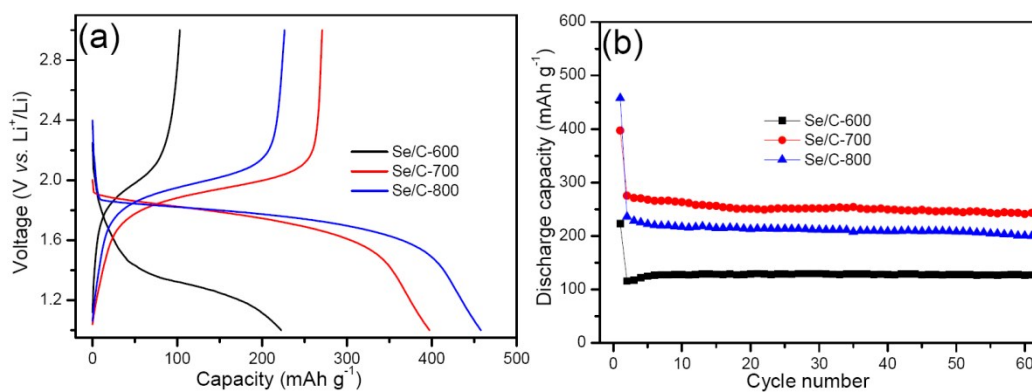

Fig. S6. (a) Initial discharge-charge curves and (b) cycling stability of as-prepared different Se/C composite at  $81 \text{ mA g}^{-1}$  (the overall data based on total Se/C composite).

**Tab. S1.** The comparative structures and electrochemical performances of similar Se/C composite.

| Sample                      | BET surface area (m <sup>2</sup> g <sup>-1</sup> ) | Se content (wt%) | Capacity (mAh g <sup>-1</sup> ) | Capacity retention       | Rate capability (mAh g <sup>-1</sup> ) |
|-----------------------------|----------------------------------------------------|------------------|---------------------------------|--------------------------|----------------------------------------|
| Se/porous carbon sphere [1] | 1358                                               | ~50              | 660 (0.1C)                      | Almost no decay          | 485 (1.87C)                            |
| Se/MOFs-based carbon [2]    | ~300                                               | 48               | 719.7 (2C)                      | 79.4% (3C, 100 cycles)   | 281.2 (5C)                             |
| Se/porous carbon fibers[3]  | 936                                                | 52.3             | 555 (0.5C)                      | 93.0% (0.5C, 900 cycles) | 306 (4 A g <sup>-1</sup> )             |
| Se/Carbon bubbles [4]       | Unknown                                            | ~50              | 691.1 (0.1C)                    | 74.5% (0.1C, 100 cycles) | 431.9 (1C)                             |
| Se/PPDC [5]                 | 1852                                               | 47               | 650 (0.1C)                      | 75.4% (0.1C, 80 cycles)  | 410 (1.3C)                             |
| Se/MMPBc [6]                | 1539.4                                             | 56               | 597.4 (0.2C)                    | 78.1%(0.2C, 300 cycles)  | 421.0 (2C)                             |
| This work                   | 816.2                                              | ~50              | 550.5 (0.24C)                   | 88.2% (0.24C, 80 cycles) | 452.3 (1.2C)                           |

The total electrochemical data based on net Se component, 1C = 675 mA g<sup>-1</sup>.

### Reference

- [1] Y. Jiang, X.J. Ma, J.K. Feng, S.L. Xiong, *J. Mater. Chem. A*, 2015, **3**, 4539-4546.
- [2] T. Liu, Y. Zhang, J.K. Hou, S.Y. Lu, Y. Jiang, M.W. Xu, *RSC Adv.*, 2015, **5**, 84038-84043.
- [3] L.C. Zeng, W.C. Zeng, Y. Jiang, X. Wei, Y.W. Zhu, Y. Yu, *Adv. Energy Mater.*, 2015, 1401377.
- [4] J.J. Zhang, L. Fan, Y.C. Zhu, Y.H. Xu, J.W. Liang, Y.T. Qian, *Nanoscale*, 2014, **6**, 12952-12957.
- [5] K.L. Sun, H.B. Zhao, S.Q. Zhang, J. Yao, J.Q. Xu, *Ionics*, 2015, **21**, 2477-2484.
- [6] H. Zhang, F.Q. Yu, W.P. Kang, Q. Shen, *Carbon*, 2015, **95**, 354-363.
